# Supplementary material
Source: Springer Nature journal article supplement (https://www.springermedizin.de/resource/supplementary/12889_2010_3169_MOESM1_ESM.pdf/9488152)
Supplement: MOESM1 [file 9488152]

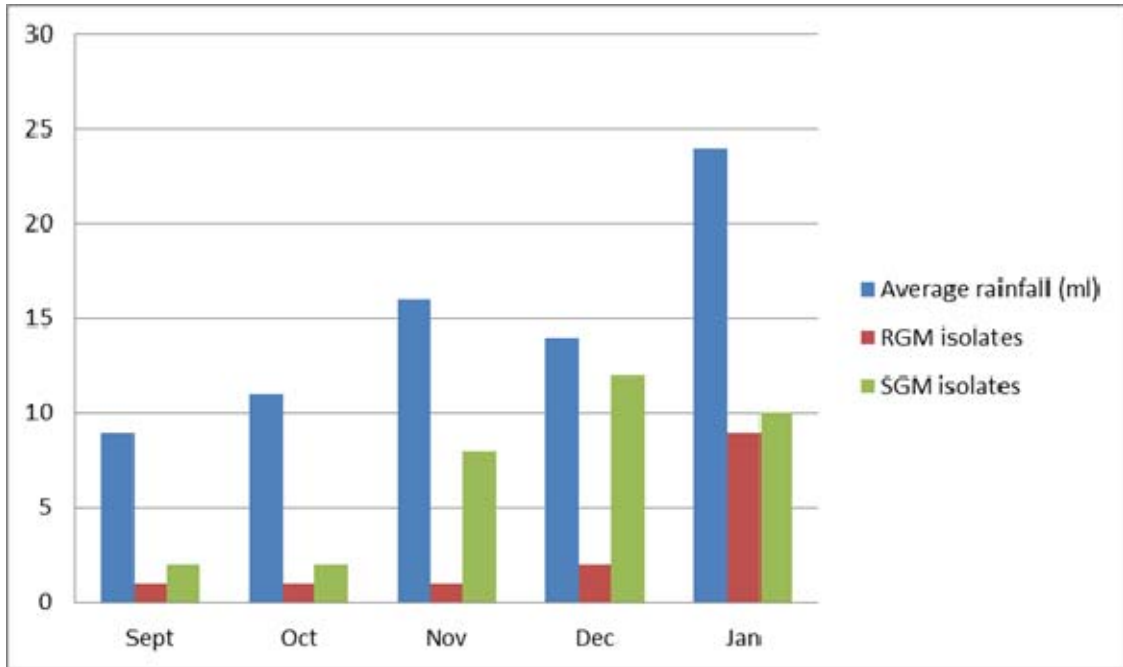

**RGM:** *M. fortuitum peregrinum* complex, *M. parafortuitum*, *M. vanbaalenii* and *M. chubuense*. **SGM:** *M. avium* complex, *M. gordonae*, *M. terrae*, *M. arupense*, *M. nonchromogenicum*, *M. hiberniae*, *M. engbaekii*, *M. kubicae*, *M. sensuense* and *M. simiae*
